# Supplementary material
Source: PubMed Central journal article supplement (PMC3208977)
Supplement: supp_77.22.7962_AEM5402-11_supplemental.pdf [file supp_77.22.7962_AEM5402-11_supplemental.pdf]

## 1 **Supplementary Material**

### 2 **Screening of bacterial isolates for oil degradation capability.**

3 Pure cultures from five of the 14 genera isolated (SSU rRNA gene sequences most  
4 similar to those from *Alcanivorax dieselolei*, *Acinetobacter sp.*, *Pseudidiomarina*  
5 *maritima*, *Marinobacter hydrocarbonoclasticus*, and *Vibrio hepatarius*) were tested for  
6 oil consumption under aerobic conditions (Table 4). Oil degradation capability was  
7 confirmed from the quantification of residual oil and concomitant growth as optical  
8 density and/or cell protein. Strains were inoculated in triplicate into the artificial seawater  
9 medium buffered with 10 mM HEPES (pH 7.0) and supplemented with 0.5 to 1% of  
10 autoclaved crude oil as the sole carbon source. Cultures were incubated at room  
11 temperature along with an uninoculated control. Flasks were shaken intermittently by  
12 hand for aeration. For gravimetric testing, the entire volume of each culture was extracted  
13 in an equal volume of chloroform after 5 days of incubation (Nakamura et al., 2007;  
14 Okafor et al., 2009). After extraction, the organic phase was decanted into a round  
15 bottom flask and evaporated in a fume hood. Residual oil was transferred in chloroform  
16 to pre-weighed glass vials, evaporated again, and weight was determined with an  
17 electronic balance (Ohaus, NJ, US).

18 To determine the growth kinetics of isolates during oil degradation, residual oil  
19 was quantified in chloroform extracts by spectrophotometry (Shimadzu) at 520 nm (Eze  
20 and Onwurah 2004, Rengathavasi *et al.*, 2010). Replicate cultures were sacrificed at  
21 regular intervals and residual oil was extracted as described above. Residual oil  
22 concentrations were determined by comparison to a standard calibration curve generated  
23 from standard additions of DH source oil in chloroform. Bacterial growth was monitored

24 during screening by optical density at 600 nm as well as by quantification of total cellular  
25 protein content using the Coomassie protein assay kit (Thermo Scientific; Bradford,  
26 1976).

27 Results of gravimetric analysis indicated that the *Alcanivorax* strain followed by  
28 the *Acinetobacter* strain showed the highest oil degradation potential; these strains  
29 degraded 93 and 90% of extracted crude oil, respectively, in comparison to autoclaved  
30 and un-inoculated control cultures (Fig. S1). Strains of *Marinobacter* and  
31 *Pseudidiomarina* showed moderate (36%) and small (12%) amounts of oil degradation,  
32 respectively, while the *Vibrio* strain did not show any sign of oil degradation in pure  
33 culture (Fig. S1).

34 Growth of the isolates as measured by optical density (OD@600 nm) and by total  
35 cellular protein content was concomitant with the depletion of oil in culture. Un-  
36 inoculated control cultures showed no sign of weathering or depletion of oil (Fig. S2).  
37 The *Acinetobacter* strain grew most rapidly with a generation time of 30 h followed by  
38 the *Alcanivorax* strain (53 h), while the *Marinobacter* strain showed a longer generation  
39 time of 82 h among the selected isolates. The *Acinetobacter* strain produced the highest  
40 amount of cell biomass followed by *Marinobacter* and *Alcanivorax* strains with Macondo  
41 oil as the sole carbon source, while the other two strains produced a negligible amount of  
42 cell biomass under similar culture conditions. Similar results were obtained from these  
43 cultures when quantifying residual oil by either gravimetric or spectrophotometric assays.

#### 44 **Preliminary physiological testing of representative oil-degrading bacterial isolates.**

45 Initial physiological characterization of representative oil-degrading isolates was  
46 conducted using Phenotypic MicroArray<sup>TM</sup> (PM) analysis. PM tests were performed by

47 Biolog, Inc. (Hayward, CA) according to methods described previously (2, 7). PM  
48 testing included salt tolerance, a wide variety of carbon sources (alcohols, amines, amino  
49 acids, carbohydrates, carboxylic acids, esters, fatty acids, and polymers) as well as  
50 inorganic and organic forms of major nutrients (N, P, and S). All strains metabolized in  
51 the presence of NaCl concentrations up to 10 %. *Vibrio*, *Acinetobacter*, and  
52 *Marinobacter* strains all utilized a fairly broad range of carbon substrates, with the *Vibrio*  
53 strain using by far the largest number of different carbon sources. In contrast, the  
54 *Alcanivorax* strain utilized relatively few carbon sources among those tested. The  
55 *Alcanivorax* strain metabolized few amino acids, carboxylic acids, and polymers relative  
56 to the other strains and no carbohydrates were utilized. Tween compounds, which  
57 contain long-chain alkyl moieties, were metabolized by all strains tested.

58 Contrasts were observed between oil-degrading strains in their phenotypes of  
59 major nutrient metabolism. The *Acinetobacter* strain showed by far the broadest range  
60 for the utilization of all inorganic and organic nutrient forms. In contrast, the *Vibrio*  
61 strain utilized the narrowest range of major nutrients. *Vibrio* and *Alcanivorax* tests  
62 indicated a preference for organic N sources (other than amino acids) such as urea, while  
63 neither strain metabolized inorganic N forms. *Vibrio* showed a relatively limited range  
64 with regard to P utilization; a small number of organic P sources and no inorganic P  
65 sources were utilized. The remaining strains utilized a wide variety of inorganic and  
66 organic P and S forms.

#### 67 **Quantitative molecular analyses for tracking *Alcanivorax* spp.**

68 This section provides further details on the design of PCR primers targeted to  
69 *Alcanivorax* spp. Within the Greengenes database formatted for ARB (5), 88 sequences

70 were identified as belonging to the family *Alcanivoraceaceae*. The forward primer  
71 (Alcvx-464F) was highly specific to this family and targeted 63 of the 88 sequences  
72 perfectly, and 87 of the 88 with a single mismatch. Even allowing for two mismatches, no  
73 non-*Alcanivoraceaceae* sequences matched this primer site. The reverse primer (Alcvx-  
74 675R) targeted all *Alcanivoraceaceae* sequences with no mismatches, and targeted, non-  
75 systematically, seven other Proteobacterial sequences. Allowing for 1 mismatch, the  
76 reverse primer targets a larger number of Proteobacterial and non-Proteobacterial  
77 sequences (452 out of a dataset of 137,853 sequences). In combination, the two primers  
78 provide conditions for highly-specific amplification of *Alcanivoraceaceae* sequences,  
79 though some members, such as *A. venustensis* (e.g. AF328762), may not be reliably  
80 amplified due to a single mismatch with the primer set. We attempted to employ a  
81 degenerate primer set to amplify these organisms as well, but were unable to generate  
82 high efficiency qPCR reactions (data not shown).

83 **Community fingerprinting analysis: bacterial community shifts in response to oil**  
84 **contamination.**

85 Bacterial community structure was initially assessed using automated ribosomal  
86 intergenetic spacer region analysis (ARISA), a community fingerprinting method based  
87 on length heterogeneity in the intergenic spacer region of the bacterial rRNA operon (11,  
88 12). This technique allowed for the rapid comparison of a large number of samples and  
89 aided in identifying critical samples for pyrotag sequencing. The intergenic spacer region  
90 between the 16S SSU and 23S and large subunit (LSU) rRNA genes was amplified using  
91 previously published primers, S-D-Bact-1522-b-S-20 and L-D-Bact-132-a-A-18 (11).  
92 PCR reactions were conducted in 50 ul reactions containing 5 ul of 10X DreamTaq Green

93 Buffer (Fermentas, Glen Burnie, MD), 0.5  $\mu$ M of each primer, 0.2 mM of each dNTP  
94 (New England BioLabs, Ipswich, MA), and 1.25 U of DreamTaq Green DNA  
95 polymerase. Reactions were subject to an initial denaturation at 95° C for 5 min, followed  
96 by 28 cycles consisting of 30 seconds at 94° C, 1 min at 50° C, and 1 min at 72° C,  
97 ending with a final elongation step at 72° C for 10 min.

98 PCR products were cleaned using a MoBio UltraClean PCR Clean-up Kit (Mo  
99 Bio Laboratories, Carlsbad, CA) following manufacturer's protocol. However, PCR  
100 products were eluted in 15  $\mu$ l. DNA concentration was assessed using a NanoDrop  
101 spectrophotometer and normalized to 100 ng/ $\mu$ l in each sample. PCR products were  
102 separated on an Agilent 2100 Bioanalyzer using the Agilent DNA 7500 kit (Agilent  
103 Technologies, Santa Clara, CA, USA).

104 Fragment peaks were assigned a size and DNA molarity value using algorithms  
105 implemented in the Agilent 2100 Expert Software. Due to a  $\pm$  5% error associated with  
106 fragment length, all peaks were binned within the percent error and the molarity values  
107 were summed. Sample profiles were normalized and  $\log(X+1)$  transformed in the  
108 software package Primer6 to down weight dominant peaks (4). A non-parametric  
109 multidimensional scaling (NMDS) plot was generated from a Bray-Curtis similarity  
110 matrix to compare samples. Qualitative oil assessment was used to group samples and an  
111 analysis of similarity (ANOSIM) test was used to determine the validity of using oil  
112 contamination as a grouping factor (Figure S1B).

113 Over 150 samples, spanning three sampling trips, which were collected from  
114 clean and oiled sands from Pensacola Beach, were analyzed using ARISA based  
115 community fingerprinting. Results indicate a consistent microbial response pattern to the

116 response pattern seen in the pyrosequencing data (Figure S1). An analysis of similarity  
117 (ANOSIM) test was performed rejecting the null hypothesis with a global R value of 0.21  
118 corresponding to a P value of 0.001. Furthermore, pairwise tests (Figure S1-B) were  
119 performed, revealing all but the low and moderate oil groupings are significant  
120 groupings. A similarity of percentages (SIMPER) test was used to determine key  
121 fragments that lead to significant oil level groupings (Figure S1-C).

122         Due to the high stress value in Figure S1-A, we are unable to look at variation on  
123 a smaller scale. Figures S1 D-J represent similar sample types and are subsets of Figure  
124 S1-A. Clustering of sectioned core samples (Figures S1 D,E,F) by oil level and grouping  
125 by depth or location on the beach face was not significant by an ANOSIM test (data not  
126 shown). In the case of the July 30<sup>th</sup> sampling trip, two clusters of clean sand samples  
127 were evident corresponding to surface layers of all four cores. There was a robust algal  
128 bloom during this sampling trip that could explain the separate surface group. Figures S1  
129 G-H represent samples taken along a vertical transect beginning at the surface and  
130 spanning the oil layer to visibly clean sands below. In both cases, the deep clean sands  
131 were more similar than the sands sampled in the oil layer. Trajectories are overlaid on  
132 both plots starting at the surface and proceeding to the deepest samples. In overlying the  
133 trajectories, not all points were included. Samples were also collected along a horizontal  
134 transect following the oil layer from the high beach to the low beach (Figure S1-I,J).

### 135 **Comparison of Multivariate Ordination Methods.**

136         Pyrosequencing data was analyzed using redundant methods in order to assure  
137 that ordination patterns effectively represented variations in bacterial community  
138 structure. In addition to Bray-Curtis distance, sample similarity was assessed with the

139 weighted UniFrac distance metric (3, 8). Unlike Bray-Curtis distance, weighted UniFrac  
140 is a phylogenetic metric that includes relative OTU abundances to calculate pairwise  
141 similarity. A high degree of similarity between Bray Curtis and weighted UniFrac  
142 distance matrices was observed as assessed statistically ( $\rho = 0.72$ ,  $p < 0.0001$ ) by the  
143 RELATE test in Primer6. In order to visually compare these metrics, the resulting  
144 distance matrices were ordinated using NMDS plots. Both distance metrics produce  
145 similar large scale grouping patterns, although the weighted UniFrac method emphasized  
146 an outlier (Supplemental Figure 2). After further investigation, the outlier sample was  
147 dominated by OTU within the phylum *Spirochaeta*. Plots generated from weighted  
148 UniFrac distance did not distinguish between St. George Island and clean Pensacola  
149 Beach sands. In addition, the weighted UniFrac metric yielded larger distances between  
150 corresponding RNA-based and DNA-based sequence libraries. This pattern is likely due  
151 to increases in Alphaproteobacterial OTU in RNA based libraries.

152 Abundance data transformations were also employed to weigh the contributions  
153 of abundant and rare OTU (4). Surprisingly, Bray Curtis distance matrices after square  
154 root (includes common and intermediately abundant OTU) and fourth root (include rare  
155 OTU) transformations were almost identical ( $\rho$  values ranging for 0.98 to 0.99,  $p <$   
156 0.001).

157

158

159 **Supplementary Information References**

- 160 1. **Bin, Y. Z., Q. Y. Chen, Y. Nakamura, K. Tsuda, and M. Matsuo.** 2007.  
161 Preparation and characterization of carbon films prepared from poly(vinyl  
162 alcohol) containing metal oxide and nano fibers with iodine pretreatment. *Carbon*  
163 **45:1330-1339.**
- 164 2. **Bochner, B. R.** 2009. Global phenotypic characterization of bacteria. *FEMS*  
165 *Microbiology Reviews* **33:191-205.**
- 166 3. **Caporaso, J. G., J. Kuczynski, J. Stombaugh, K. Bittinger, F. D. Bushman, E.**  
167 **K. Costello, N. Fierer, A. G. Pena, J. K. Goodrich, J. I. Gordon, G. A.**  
168 **Huttley, S. T. Kelley, D. Knights, J. E. Koenig, R. E. Ley, C. A. Lozupone, D.**  
169 **McDonald, B. D. Muegge, M. Pirrung, J. Reeder, J. R. Sevinsky, P. J.**  
170 **Turnbaugh, W. A. Walters, J. Widmann, T. Yatsunenko, J. Zaneveld, and R.**  
171 **Knight.** 2010. QIIME allows analysis of high-throughput community sequencing  
172 data. *Nature Methods* **7:335-336.**
- 173 4. **Clarke, K. R., and R. M. Warwick.** 2001. Change in marine communities: an  
174 approach to statistical analysis and interpretation, 2 ed. Primer-E, Plymouth.
- 175 5. **DeSantis, T. Z., P. Hugenholtz, N. Larsen, M. Rojas, E. L. Brodie, K. Keller,**  
176 **T. Huber, D. Dalevi, P. Hu, and G. L. Andersen.** 2006. Greengenes, a chimera-  
177 checked 16S rRNA gene database and workbench compatible with ARB. *Applied*  
178 *and Environmental Microbiology* **72:5069-5072.**
- 179 6. **Eze, A. A., and I. N. E. Onwurah.** 2004. Extraction of crude oil from  
180 contaminated soil with cell free diculture broth and its application in microbial  
181 enhanced oil recovery. *Journal of Nigerian Environmental Society* **2:37-43.**



- 182 7. **Lei, X. H., L. Zhou, B. L. Wanner, and B. R. Bochner.** 2003. Phenotype  
183 microarray analysis of two-component regulatory genes of *Escherichia coli*.  
184 Abstracts of the General Meeting of the American Society for Microbiology  
185 **103**:K-144.
- 186 8. **Lozupone, C., M. Hamady, and R. Knight.** 2006. UniFrac - An online tool for  
187 comparing microbial community diversity in a phylogenetic context. *BMC*  
188 *Bioinformatics* **7**:371.
- 189 9. **Okafor, P. C., I. E. Uwah, O. O. Ekerenam, and U. J. Ekpe.** 2009. Combretum  
190 bracteosum extracts as eco-friendly corrosion inhibitor for mild steel in acidic  
191 medium. *Pigment & Resin Technology* **38**:236-241.
- 192 10. **Ramette, A.** 2007. Multivariate analyses in microbial ecology. *FEMS*  
193 *Microbiology Ecology* **62**:142-160.
- 194 11. **Ranjard, L., F. Poly, J.-C. Lata, C. Mougel, J. Thioulouse, and S. Nazaret.**  
195 2001. Characterization of bacterial and fungal soil communities by automated  
196 ribosomal intergenic spacer analysis fingerprints: biological and methodological  
197 variability. *Applied and Environmental Microbiology* **67**:4479-4487.
- 198 12. **Roesch, L. F. W., G. L. Lorca, G. Casella, A. Giongo, A. Naranjo, A. M.**  
199 **Pionzio, N. Li, V. Mai, C. H. Wasserfall, D. Schatz, M. A. Atkinson, J. Neu,**  
200 **and E. W. Triplett.** 2009. Culture-independent identification of gut bacteria  
201 correlated with the onset of diabetes in a rat model. *International Society for*  
202 *Microbial Ecology* **3**:536-548.
- 203 13. **Thavasi, R., S. Jayalakshmi, and I. M. Banat.** 2011. Effect of biosurfactant and  
204 fertilizer on biodegradation of crude oil by marine isolates of *Bacillus*

205 megaterium, *Corynebacterium kutscheri* and *Pseudomonas aeruginosa*.

206 *Bioresource Technology* **102**:772-778.

207

208

209

210 FIGURE LEGENDS

211 Figure S1: Degradation of crude oil by representative pure cultures isolated from oiled  
212 beach sands in this study. The proportion of residual oil is plotted along with the  
213 concomitant increase in cell biomass. Residual oil was extracted with chloroform and  
214 measured gravimetrically in pre-weighted glass vials. Values are the average of triplicates  
215 and error bars represent one standard deviation.

216

217 Figure S2: Growth response ( $\nabla$ ) as total cellular protein, of *Marinobacter* (A),  
218 *Acinetobacter* (B) and *Alcanivorax* (C) strains with concomitant crude oil degradation  
219 ( $\bullet$ ) in comparison to uninoculated control cultures ( $\bullet$ ). The concentration of residual oil  
220 was determined spectrophotometrically in chloroform extracts ( $\lambda=520$ ) and total cellular  
221 protein was quantified using the Bradford method. Values represent the average of  
222 triplicates and error bars represent one standard deviation.

223

224 Figure S3. Community fingerprinting data generated through ARISA based analysis.  
225 These data represent 150 samples, spanning three sampling trips, that were collected from  
226 clean and oiled sands from Pensacola Beach. All NMDS plots were generated from a  
227 Bray-Curtis resemblance matrix calculated using  $\log(X+1)$  transformed, normalized peak  
228 data. Shading corresponds to qualitative assessment of oil contamination (white = clean,  
229 light gray = low, gray = moderate, black = heavy). When present, clustering represents  
230 Bray-Curtis similarity between samples. (A) All samples collected from the study area to  
231 date. Clustering pattern indicates pronounced, if scattered, effect of oil contamination.  
232 (B) Analysis of similarity (ANOSIM) test performed on all samples to determine

233 significance of grouping samples by qualitative oil contamination. The global R value  
234 was 0.21 corresponding to a global P value of 0.001. Pairwise p-values are indicated in  
235 the table and black cells are significant. (C) A similarity percentages (SIMPER) test was  
236 used to determine key fragments that lead to the significant grouping patterns. Note all 4  
237 top peaks for the low and moderate groups are the same. (D-E) Sectioned core samples  
238 taken from all 3 sampling trips. † These samples were from the surface layer of the cores  
239 during an algal bloom are likely contaminated by chloroplast DNA (F,G) Vertical  
240 transect samples taken from beach surface, through the oil layer to clean underlying  
241 sediments. Trajectories are overlaid on both plots starting at the surface and preceding to  
242 the deepest samples. Note not all points were included in the trajectories. (H,I) Samples  
243 collected along a horizontal transect along the oil layer. Over laid trajectories began  
244 furthest from the beach and proceed to the water.

245

246 Figure S4. Bacterial community response to oil contamination in beach sands assessed  
247 using the weighted UniFrac metric and visualized with NMDS plots. Pensacola oiled  
248 samples are colored black, clean Pensacola and St. George Island samples are colored  
249 grey. Lowercase letters indicate samples derived from the same sand sample, asterisks (\*)  
250 indicate RNA based sequence libraries. Subplot (A) includes all samples, while the  
251 outlier (dominated by Spirochaetes) is removed in subplot (B). Microbial communities  
252 reveal a strong response to oil contamination by grouping together on the left side of the  
253 plot. Notably, St. George Island samples (e,f) and clean Pensacola samples are not  
254 resolved using weighted UniFrac.

255

256 Table S1. Sample IDs from Pensacola Beach are described in the materials and methods  
 257 section. The last 8 sample IDs refer to samples collected at the pristine beach of St.  
 258 George Island. The first letter designates the site sampled (B, Bay side; G, Gulf side),  
 259 and the second letter refers to the type of sample (S, sediment; W, water column), while  
 260 the third letter designates whether the pyrosequence library was DNA (D) or RNA (R)  
 261 based.  
 262

| Sample ID | Qualitative Oil Assessment | Sequences | OTU  | Percent Coverage | Shannon | % <i>Alcanivorax</i> |
|-----------|----------------------------|-----------|------|------------------|---------|----------------------|
| OS-55     | 0                          | 4927      | 1116 | 77%              | 6.1     | 0.0%                 |
| OS-56     | 0                          | 5094      | 698  | 88%              | 5.6     | 0.0%                 |
| OS-57     | 0                          | 7061      | 1168 | 79%              | 5.9     | 0.0%                 |
| OS-58     | 0                          | 9296      | 1274 | 79%              | 6.0     | 0.0%                 |
| OS-71     | 3                          | 7091      | 942  | 84%              | 4.7     | 33.0%                |
| OS-72     | 1                          | 6859      | 1340 | 76%              | 5.0     | 30.0%                |
| OS-73     | 0                          | 3872      | 920  | 78%              | 5.2     | 11.0%                |
| OS-74     | 0                          | 6604      | 1296 | 76%              | 5.1     | 3.0%                 |
| OS.71R    | 3                          | 2874      | 663  | 82%              | 4.9     | 12.0%                |
| OS.72R    | 1                          | 2623      | 1210 | 60%              | 6.0     | 6.0%                 |
| OS.73R    | 0                          | 1673      | 981  | 56%              | 6.4     | 2.0%                 |
| OS.74R    | 0                          | 2122      | 1058 | 60%              | 6.0     | 3.0%                 |
| OS-230    | 3                          | 7122      | 1053 | 84%              | 4.9     | 9.0%                 |
| OS-231    | 3                          | 5013      | 971  | 81%              | 4.9     | 15.0%                |
| OS-233    | 3                          | 5614      | 1065 | 80%              | 5.0     | 10.0%                |
| OS-234    | 3                          | 6181      | 1155 | 79%              | 5.1     | 10.0%                |
| OS-236    | 3                          | 6722      | 622  | 90%              | 3.6     | 1.0%                 |
| OS-237    | 3                          | 7397      | 893  | 87%              | 4.8     | 5.0%                 |
| OS-239    | 3                          | 8002      | 1127 | 83%              | 5.0     | 11.0%                |
| OS-240    | 3                          | 7396      | 1051 | 84%              | 5.0     | 9.0%                 |
| OS-242    | 0                          | 7502      | 2139 | 64%              | 6.1     | 2.0%                 |
| OS-243    | 0                          | 6793      | 2023 | 64%              | 6.2     | 2.0%                 |
| BSD       | 0                          | 9837      | 3063 | 58%              | 6.3     | 0.0%                 |
| BSR       | 0                          | 5078      | 1007 | 81%              | 5.8     | 0.0%                 |
| GSD       | 0                          | 11015     | 3680 | 52%              | 6.6     | 0.0%                 |
| GSR       | 0                          | 15244     | 5366 | 44%              | 6.8     | 0.0%                 |
|           |                            |           |      |                  |         |                      |
| BWD       | 0                          | 7609      | 1096 | 83%              | 4.9     | 0.0%                 |
| BWR       | 0                          | 12673     | 1402 | 85%              | 4.6     | 0.0%                 |
| GWD       | 0                          | 11986     | 1002 | 89%              | 4.0     | 0.0%                 |
| GWR       | 0                          | 11238     | 1239 | 85%              | 4.6     | 0.0%                 |

263

264 Table S2. Physiological characterization of representative oil-degrading isolates from this  
 265 study conducted using Phenotypic MicroArray™ (PM) analysis. PM tests were  
 266 performed by Biolog, Inc. (Hayward, CA) (see above for further details). Values  
 267 represent the average height recorded from the OmniLog™ instrument as a proxy of  
 268 metabolism for each strain and test conducted on the microarray. The microarray plate  
 269 used is identified in column 1 and the location of the test on the array is given in column  
 270 2. Further information on PM Technology testing and reporting procedures can be found  
 271 at: <http://www.biolog.com/phenoMicro.html>.  
 272

| Plate | Well | Chemical                    | <b>Marinobacter<br/>sp. strain EN3</b> | <b>Alcanivorax<br/>sp. strain PN3</b> | <b>Vibrio sp.<br/>strain PN4</b> | <b>Acineotbacter<br/>sp. strain COS2</b> |
|-------|------|-----------------------------|----------------------------------------|---------------------------------------|----------------------------------|------------------------------------------|
|       |      |                             | Average Height (2 replicates)          |                                       |                                  |                                          |
| PM1   | A01  | Negative Control            | 41.00                                  | 29.50                                 | 41.00                            | 35.00                                    |
| PM1   | A02  | L-Arabinose                 | 70.00                                  | 20.50                                 | 20.00                            | 26.50                                    |
| PM1   | A03  | N-Acetyl-D-Glucosamine      | 32.00                                  | 15.00                                 | 189.00                           | 22.00                                    |
| PM1   | A04  | D-Saccharic acid            | 36.00                                  | 9.50                                  | 37.00                            | 20.00                                    |
| PM1   | A05  | Succinic acid               | 128.00                                 | 29.00                                 | 184.50                           | 127.00                                   |
| PM1   | A06  | D-Galactose                 | 26.50                                  | 3.50                                  | 17.50                            | 11.50                                    |
| PM1   | A07  | L-Aspartic acid             | 38.00                                  | 18.50                                 | 209.50                           | 27.00                                    |
| PM1   | A08  | L-Proline                   | 140.00                                 | 14.50                                 | 165.00                           | 228.50                                   |
| PM1   | A09  | D-Alanine                   | 78.00                                  | 13.50                                 | 180.50                           | 202.50                                   |
| PM1   | A10  | D-Trehalose                 | 32.50                                  | 15.00                                 | 177.50                           | 25.50                                    |
| PM1   | A11  | D-Mannose                   | 44.50                                  | 20.50                                 | 200.50                           | 31.50                                    |
| PM1   | A12  | Dulcitol                    | 45.50                                  | 31.00                                 | 67.50                            | 41.00                                    |
| PM1   | B01  | D-Serine                    | 43.00                                  | 27.00                                 | 29.50                            | 33.50                                    |
| PM1   | B02  | D-Sorbitol                  | 26.50                                  | 12.00                                 | 56.50                            | 18.00                                    |
| PM1   | B03  | Glycerol                    | 24.50                                  | 10.00                                 | 156.00                           | 16.00                                    |
| PM1   | B04  | L-Fucose                    | 36.50                                  | 8.00                                  | 163.50                           | 18.00                                    |
| PM1   | B05  | D-Glucuronic acid           | 43.00                                  | 14.00                                 | 30.00                            | 20.50                                    |
| PM1   | B06  | D-Gluconic acid             | 38.00                                  | 7.50                                  | 203.50                           | 24.00                                    |
| PM1   | B07  | D,L-a-Glycerol Phosphate    | 33.50                                  | 10.00                                 | 136.00                           | 20.50                                    |
| PM1   | B08  | D-Xylose                    | 70.00                                  | 8.50                                  | 20.50                            | 19.50                                    |
| PM1   | B09  | L-Lactic acid               | 133.50                                 | 58.50                                 | 188.00                           | 19.50                                    |
| PM1   | B10  | Formic acid                 | 28.50                                  | 11.50                                 | 32.00                            | 21.00                                    |
| PM1   | B11  | D-Mannitol                  | 31.50                                  | 14.00                                 | 195.00                           | 25.00                                    |
| PM1   | B12  | L-Glutamic acid             | 95.50                                  | 33.50                                 | 222.50                           | 232.00                                   |
| PM1   | C01  | D-Glucose-6-Phosphate       | 49.50                                  | 27.00                                 | 63.50                            | 32.00                                    |
| PM1   | C02  | D-Galactonic acid-g-Lactone | 28.00                                  | 13.50                                 | 27.00                            | 16.50                                    |
| PM1   | C03  | D,L-Malic acid              | 143.00                                 | 12.50                                 | 29.00                            | 160.50                                   |
| PM1   | C04  | D-Ribose                    | 105.00                                 | 29.00                                 | 26.50                            | 29.50                                    |
| PM1   | C05  | Tween 20                    | 85.00                                  | 87.00                                 | 139.50                           | 109.00                                   |
| PM1   | C06  | L-Rhamnose                  | 39.50                                  | 15.50                                 | 21.00                            | 21.00                                    |
| PM1   | C07  | D-Fructose                  | 34.50                                  | 6.00                                  | 178.50                           | 24.50                                    |

|     |     |                                  |        |        |        |        |
|-----|-----|----------------------------------|--------|--------|--------|--------|
| PM1 | C08 | Acetic acid                      | 122.50 | 20.00  | 17.50  | 111.00 |
| PM1 | C09 | a-D-Glucose                      | 28.50  | 4.50   | 175.00 | 16.00  |
| PM1 | C10 | Maltose                          | 31.50  | 12.00  | 209.00 | 19.50  |
| PM1 | C11 | D-Melibiose                      | 35.00  | 11.50  | 49.00  | 22.00  |
| PM1 | C12 | Thymidine                        | 43.00  | 28.00  | 134.50 | 37.00  |
| PM1 | D01 | L-Asparagine                     | 52.50  | 29.50  | 221.50 | 135.00 |
| PM1 | D02 | D-Aspartic acid                  | 47.00  | 20.50  | 36.00  | 30.50  |
| PM1 | D03 | D-Glucosaminic acid              | 45.00  | 31.00  | 38.00  | 32.00  |
| PM1 | D04 | 1,2-Propanediol                  | 38.00  | 21.00  | 38.00  | 26.50  |
| PM1 | D05 | Tween 40                         | 109.50 | 104.00 | 70.00  | 129.00 |
| PM1 | D06 | a-Ketoglutaric acid              | 33.50  | 26.50  | 140.00 | 27.00  |
| PM1 | D07 | a-Ketobutyric acid               | 24.50  | 3.00   | 41.00  | 30.00  |
| PM1 | D08 | a-Methyl-D-Galactoside           | 24.00  | 5.00   | 37.00  | 14.50  |
| PM1 | D09 | a-D-Lactose                      | 28.50  | 6.50   | 53.00  | 16.50  |
| PM1 | D10 | Lactulose                        | 32.50  | 8.50   | 51.00  | 19.50  |
| PM1 | D11 | Sucrose                          | 32.00  | 19.00  | 181.00 | 23.00  |
| PM1 | D12 | Uridine                          | 40.50  | 22.50  | 131.50 | 36.00  |
| PM1 | E01 | L-Glutamine                      | 76.00  | 45.00  | 230.50 | 49.00  |
| PM1 | E02 | m-Tartaric acid                  | 46.50  | 23.50  | 31.50  | 31.00  |
| PM1 | E03 | D-Glucose-1-Phosphate            | 40.00  | 19.50  | 52.00  | 28.50  |
| PM1 | E04 | D-Fructose-6-Phosphate           | 40.50  | 18.50  | 18.50  | 24.00  |
| PM1 | E05 | Tween 80                         | 109.00 | 115.50 | 68.50  | 200.00 |
| PM1 | E06 | a-Hydroxyglutaric acid-g-Lactone | 35.00  | 11.00  | 14.00  | 22.50  |
| PM1 | E07 | a-Hydroxybutyric acid            | 42.00  | 4.50   | 57.50  | 19.50  |
| PM1 | E08 | b-Methyl-D-Glucoside             | 22.00  | 5.00   | 38.00  | 12.50  |
| PM1 | E09 | Adonitol                         | 25.50  | 9.00   | 59.00  | 15.50  |
| PM1 | E10 | Maltotriose                      | 34.50  | 12.00  | 187.00 | 21.00  |
| PM1 | E11 | 2'-Deoxyadenosine                | 30.00  | 11.00  | 94.50  | 20.00  |
| PM1 | E12 | Adenosine                        | 47.00  | 39.50  | 218.50 | 44.50  |
| PM1 | F01 | Gly-Asp                          | 66.50  | 51.50  | 199.50 | 52.00  |
| PM1 | F02 | Citric acid                      | 84.50  | 109.50 | 65.50  | 136.50 |
| PM1 | F03 | m-Inositol                       | 32.50  | 15.50  | 37.00  | 20.00  |
| PM1 | F04 | D-Threonine                      | 40.00  | 16.00  | 35.00  | 28.50  |
| PM1 | F05 | Fumaric acid                     | 131.00 | 42.00  | 198.00 | 116.50 |
| PM1 | F06 | Bromosuccinic acid               | 42.00  | 18.50  | 93.50  | 72.00  |
| PM1 | F07 | Propionic acid                   | 131.00 | 50.50  | 22.00  | 126.50 |
| PM1 | F08 | Mucic acid                       | 24.50  | 7.00   | 20.50  | 15.50  |
| PM1 | F09 | Glycolic acid                    | 26.50  | 9.00   | 31.00  | 19.00  |
| PM1 | F10 | Glyoxylic acid                   | 37.50  | 21.00  | 43.50  | 31.50  |
| PM1 | F11 | D-Cellobiose                     | 44.00  | 23.00  | 74.50  | 33.50  |
| PM1 | F12 | Inosine                          | 51.00  | 35.00  | 234.50 | 46.50  |
| PM1 | G01 | Gly-Glu                          | 60.50  | 44.50  | 147.50 | 46.00  |

|      |     |                             |        |        |        |        |
|------|-----|-----------------------------|--------|--------|--------|--------|
| PM1  | G02 | Tricarballic acid           | 43.50  | 26.50  | 38.00  | 31.50  |
| PM1  | G03 | L-Serine                    | 34.00  | 16.50  | 209.00 | 26.50  |
| PM1  | G04 | L-Threonine                 | 36.00  | 18.50  | 197.00 | 26.50  |
| PM1  | G05 | L-Alanine                   | 84.50  | 14.00  | 178.00 | 200.50 |
| PM1  | G06 | Ala-Gly                     | 29.50  | 13.50  | 183.50 | 21.00  |
| PM1  | G07 | Acetoacetic acid            | 43.00  | 13.50  | 19.00  | 23.00  |
| PM1  | G08 | N-Acetyl-D-Mannosamine      | 27.50  | 7.50   | 221.50 | 19.50  |
| PM1  | G09 | Mono-Methylsuccinate        | 67.00  | 61.50  | 43.00  | 61.50  |
| PM1  | G10 | Methylpyruvate              | 59.50  | 91.50  | 164.00 | 160.00 |
| PM1  | G11 | D-Malic acid                | 46.00  | 31.00  | 42.50  | 77.50  |
| PM1  | G12 | L-Malic acid                | 163.00 | 41.50  | 205.50 | 181.50 |
| PM1  | H01 | Gly-Pro                     | 61.00  | 48.00  | 126.50 | 49.00  |
| PM1  | H02 | p-Hydroxyphenyl Acetic acid | 52.00  | 100.00 | 87.00  | 38.00  |
| PM1  | H03 | m-Hydroxyphenyl Acetic acid | 47.50  | 71.50  | 30.50  | 35.50  |
| PM1  | H04 | Tyramine                    | 43.50  | 142.00 | 26.50  | 34.00  |
| PM1  | H05 | D-Psicose                   | 52.50  | 21.50  | 25.50  | 31.50  |
| PM1  | H06 | L-Lyxose                    | 108.50 | 27.50  | 31.50  | 31.50  |
| PM1  | H07 | Glucuronamide               | 54.50  | 26.50  | 42.50  | 33.50  |
| PM1  | H08 | Pyruvic acid                | 126.00 | 82.00  | 186.00 | 185.00 |
| PM1  | H09 | L-Galactonic acid-g-Lactone | 46.50  | 25.00  | 46.00  | 31.50  |
| PM1  | H10 | D-Galacturonic acid         | 52.00  | 30.50  | 56.50  | 36.00  |
| PM1  | H11 | Phenylethylamine            | 50.00  | 71.50  | 81.50  | 39.50  |
| PM1  | H12 | 2-Aminoethanol              | 58.00  | 39.00  | 78.50  | 50.50  |
|      |     |                             |        |        |        |        |
| PM2A | A01 | Negative Control            | 45.00  | 37.00  | 51.50  | 44.00  |
| PM2A | A02 | Chondroitin Sulfate C       | 34.00  | 28.00  | 63.50  | 34.00  |
| PM2A | A03 | a-Cyclodextrin              | 32.50  | 19.00  | 32.50  | 29.50  |
| PM2A | A04 | b-Cyclodextrin              | 36.00  | 23.00  | 105.50 | 32.00  |
| PM2A | A05 | g-Cyclodextrin              | 33.00  | 18.00  | 191.00 | 27.00  |
| PM2A | A06 | Dextrin                     | 38.50  | 25.00  | 29.50  | 44.50  |
| PM2A | A07 | Gelatin                     | 28.50  | 17.00  | 57.00  | 29.00  |
| PM2A | A08 | Glycogen                    | 33.00  | 21.00  | 192.00 | 32.00  |
| PM2A | A09 | Inulin                      | 33.50  | 22.50  | 51.50  | 30.50  |
| PM2A | A10 | Laminarin                   | 36.00  | 23.00  | 57.50  | 32.50  |
| PM2A | A11 | Mannan                      | 40.00  | 26.00  | 111.00 | 38.00  |
| PM2A | A12 | Pectin                      | 70.50  | 74.00  | 87.00  | 71.50  |
| PM2A | B01 | N-Acetyl-D-Galactosamine    | 39.00  | 28.50  | 191.50 | 38.00  |
| PM2A | B02 | N-Acetyl-Neuraminic acid    | 22.00  | 10.50  | 24.50  | 21.50  |
| PM2A | B03 | b-D-Allose                  | 26.50  | 8.50   | 18.00  | 16.50  |
| PM2A | B04 | Amygdalin                   | 24.50  | 9.50   | 43.00  | 18.00  |



|      |     |                                      |        |       |        |        |
|------|-----|--------------------------------------|--------|-------|--------|--------|
| PM2A | B05 | D-Arabinose                          | 70.00  | 21.50 | 24.50  | 27.50  |
| PM2A | B06 | D-Arabitol                           | 22.00  | 11.00 | 19.00  | 18.50  |
| PM2A | B07 | L-Arabitol                           | 21.50  | 7.50  | 29.00  | 16.50  |
| PM2A | B08 | Arbutin                              | 24.50  | 11.00 | 39.00  | 19.50  |
| PM2A | B09 | 2-Deoxy-D-Ribose                     | 67.50  | 23.00 | 25.00  | 23.50  |
| PM2A | B10 | i-Erythritol                         | 28.00  | 18.50 | 34.50  | 24.00  |
| PM2A | B11 | D-Fucose                             | 34.00  | 18.50 | 39.00  | 27.00  |
| PM2A | B12 | 3-O-b-D-Galactopyranosyl-D-Arabinose | 43.50  | 31.00 | 30.50  | 38.50  |
| PM2A | C01 | Gentiobiose                          | 40.00  | 28.50 | 45.50  | 35.50  |
| PM2A | C02 | L-Glucose                            | 24.50  | 12.00 | 26.00  | 20.50  |
| PM2A | C03 | D-Lactitol                           | 23.50  | 6.00  | 27.50  | 15.00  |
| PM2A | C04 | D-Melezitose                         | 20.50  | 5.50  | 29.50  | 19.50  |
| PM2A | C05 | Maltitol                             | 27.50  | 6.50  | 37.00  | 17.00  |
| PM2A | C06 | a-Methyl-D-Glucoside                 | 21.50  | 6.50  | 27.00  | 16.50  |
| PM2A | C07 | b-Methyl-D-Galactoside               | 22.00  | 13.00 | 29.00  | 15.00  |
| PM2A | C08 | 3-Methylglucose                      | 19.00  | 5.50  | 18.50  | 14.50  |
| PM2A | C09 | b-Methyl-D-Glucuronic acid           | 25.00  | 9.00  | 34.50  | 26.00  |
| PM2A | C10 | a-Methyl-D-Mannoside                 | 28.00  | 16.00 | 35.50  | 24.50  |
| PM2A | C11 | b-Methyl-D-Xyloside                  | 28.00  | 21.00 | 38.00  | 25.50  |
| PM2A | C12 | Palatinose                           | 39.50  | 26.50 | 30.50  | 38.00  |
| PM2A | D01 | D-Raffinose                          | 39.00  | 27.00 | 71.00  | 35.00  |
| PM2A | D02 | Salicin                              | 22.00  | 9.50  | 29.50  | 19.00  |
| PM2A | D03 | Sedoheptulosan                       | 24.50  | 6.00  | 29.00  | 15.50  |
| PM2A | D04 | L-Sorbose                            | 28.00  | 6.50  | 9.50   | 16.50  |
| PM2A | D05 | Stachyose                            | 22.00  | 4.00  | 31.00  | 16.00  |
| PM2A | D06 | D-Tagatose                           | 36.50  | 7.00  | 8.50   | 21.50  |
| PM2A | D07 | Turanose                             | 22.50  | 3.00  | 28.00  | 16.00  |
| PM2A | D08 | Xylitol                              | 17.00  | 2.50  | 22.50  | 13.00  |
| PM2A | D09 | N-Acetyl-D-Glucosaminitol            | 23.50  | 8.50  | 21.00  | 18.50  |
| PM2A | D10 | g-Amino-N-Butyric acid               | 26.50  | 11.00 | 40.00  | 188.00 |
| PM2A | D11 | d-Amino Valeric acid                 | 22.00  | 10.00 | 28.00  | 19.00  |
| PM2A | D12 | Butyric acid                         | 128.50 | 59.00 | 70.00  | 110.00 |
| PM2A | E01 | Capric acid                          | 21.00  | 27.00 | 23.00  | 42.00  |
| PM2A | E02 | Caproic acid                         | 114.00 | 36.00 | 11.00  | 139.00 |
| PM2A | E03 | Citraconic acid                      | 19.50  | 10.00 | 23.50  | 17.50  |
| PM2A | E04 | Citramalic acid                      | 21.50  | 6.50  | 23.00  | 17.50  |
| PM2A | E05 | D-Glucosamine                        | 114.50 | 15.50 | 11.00  | 22.00  |
| PM2A | E06 | 2-Hydroxybenzoic acid                | 14.50  | 9.00  | 8.50   | 6.00   |
| PM2A | E07 | 4-Hydroxybenzoic acid                | 13.50  | 5.50  | 9.50   | 13.50  |
| PM2A | E08 | b-Hydroxybutyric acid                | 101.50 | 45.50 | 176.50 | 103.50 |

|      |     |                            |        |       |        |        |
|------|-----|----------------------------|--------|-------|--------|--------|
| PM2A | E09 | g-Hydroxybutyric acid      | 20.00  | 26.50 | 24.00  | 23.00  |
| PM2A | E10 | a-Keto-Valeric acid        | 28.00  | 8.00  | 25.50  | 18.00  |
| PM2A | E11 | Itaconic acid              | 33.00  | 9.00  | 13.00  | 16.00  |
| PM2A | E12 | 5-Keto-D-Gluconic acid     | 67.00  | 30.00 | 31.50  | 39.50  |
| PM2A | F01 | D-Lactic acid Methyl Ester | 60.00  | 38.50 | 121.50 | 35.50  |
| PM2A | F02 | Malonic acid               | 24.50  | 8.00  | 44.50  | 157.50 |
| PM2A | F03 | Melibionc acid             | 26.00  | 8.00  | 56.50  | 20.50  |
| PM2A | F04 | Oxalic acid                | 21.50  | 7.50  | 21.00  | 19.50  |
| PM2A | F05 | Oxalomalic acid            | 74.00  | 3.00  | 6.00   | 15.00  |
| PM2A | F06 | Quinic acid                | 18.50  | 6.00  | 25.00  | 16.50  |
| PM2A | F07 | D-Ribono-1,4-Lactone       | 16.00  | 3.50  | 19.00  | 14.00  |
| PM2A | F08 | Sebacic acid               | 20.50  | 33.00 | 16.50  | 15.00  |
| PM2A | F09 | Sorbic acid                | 105.00 | 51.00 | 16.00  | 140.00 |
| PM2A | F10 | Succinamic acid            | 28.00  | 37.50 | 61.50  | 32.50  |
| PM2A | F11 | D-Tartaric acid            | 27.50  | 13.50 | 23.00  | 24.50  |
| PM2A | F12 | L-Tartaric acid            | 39.00  | 22.50 | 35.50  | 33.00  |
| PM2A | G01 | Acetamide                  | 30.00  | 31.00 | 41.00  | 32.50  |
| PM2A | G02 | L-Alaninamide              | 17.00  | 8.50  | 37.00  | 17.50  |
| PM2A | G03 | N-Acetyl-L-Glutamic acid   | 19.00  | 6.50  | 82.50  | 14.50  |
| PM2A | G04 | L-Arginine                 | 20.00  | 6.50  | 135.00 | 172.00 |
| PM2A | G05 | Glycine                    | 14.00  | 1.00  | 35.50  | 9.00   |
| PM2A | G06 | L-Histidine                | 28.00  | 2.00  | 57.50  | 193.00 |
| PM2A | G07 | L-Homoserine               | 14.50  | 2.00  | 13.50  | 13.00  |
| PM2A | G08 | Hydroxy-L-Proline          | 27.50  | 6.00  | 27.50  | 19.50  |
| PM2A | G09 | L-Isoleucine               | 27.50  | 11.50 | 20.50  | 15.00  |
| PM2A | G10 | L-Leucine                  | 45.50  | 12.50 | 45.00  | 16.50  |
| PM2A | G11 | L-Lysine                   | 24.50  | 13.00 | 42.50  | 22.00  |
| PM2A | G12 | L-Methionine               | 38.00  | 26.00 | 36.00  | 31.50  |
| PM2A | H01 | L-Ornithine                | 33.50  | 21.50 | 60.50  | 31.00  |
| PM2A | H02 | L-Phenylalanine            | 22.00  | 9.50  | 36.00  | 19.50  |
| PM2A | H03 | L-Pyroglutamic acid        | 23.00  | 9.00  | 27.00  | 22.00  |
| PM2A | H04 | L-Valine                   | 109.50 | 7.00  | 30.00  | 16.50  |
| PM2A | H05 | D,L-Carnitine              | 13.00  | 3.00  | 20.50  | 9.50   |
| PM2A | H06 | sec-Butylamine             | 13.50  | 2.50  | 5.50   | 14.00  |
| PM2A | H07 | D,L-Octopamine             | 21.50  | 9.50  | 17.00  | 17.50  |
| PM2A | H08 | Putrescine                 | 25.00  | 11.50 | 31.50  | 20.00  |
| PM2A | H09 | Dihydroxyacetone           | 118.00 | 67.50 | 60.50  | 67.00  |
| PM2A | H10 | 2,3-Butanediol             | 20.00  | 19.00 | 39.00  | 17.00  |
| PM2A | H11 | 2,3-Butanedione            | 41.00  | 25.50 | 23.50  | 32.00  |
| PM2A | H12 | 3-Hydroxy-2-butanone       | 40.00  | 26.50 | 53.00  | 35.00  |
|      |     |                            |        |       |        |        |
| PM3B | A01 | Negative Control           | 43.00  | 31.50 | 64.00  | 47.50  |

|      |     |                             |        |        |        |        |
|------|-----|-----------------------------|--------|--------|--------|--------|
| PM3B | A02 | Ammonia                     | 132.50 | 36.00  | 11.50  | 106.50 |
| PM3B | A03 | Nitrite                     | 47.00  | 21.50  | 9.50   | 99.00  |
| PM3B | A04 | Nitrate                     | 116.00 | 20.00  | 5.00   | 107.00 |
| PM3B | A05 | Urea                        | 179.00 | 68.00  | 1.50   | 140.00 |
| PM3B | A06 | Biuret                      | 29.50  | 58.00  | 0.50   | 31.00  |
| PM3B | A07 | L-Alanine                   | 137.50 | 15.00  | 8.00   | 203.00 |
| PM3B | A08 | L-Arginine                  | 126.00 | 15.00  | 9.50   | 233.00 |
| PM3B | A09 | L-Asparagine                | 116.50 | 13.50  | 7.50   | 200.00 |
| PM3B | A10 | L-Aspartic acid             | 32.00  | 15.50  | 8.00   | 47.50  |
| PM3B | A11 | L-Cysteine                  | 173.50 | 26.50  | 31.00  | 58.00  |
| PM3B | A12 | L-Glutamic acid             | 153.00 | 34.50  | 25.50  | 248.50 |
| PM3B | B01 | L-Glutamine                 | 166.50 | 104.50 | 102.50 | 222.50 |
| PM3B | B02 | Glycine                     | 43.50  | 17.00  | 20.50  | 185.00 |
| PM3B | B03 | L-Histidine                 | 31.50  | 8.00   | 42.50  | 212.50 |
| PM3B | B04 | L-Isoleucine                | 60.00  | 8.00   | 3.00   | 105.50 |
| PM3B | B05 | L-Leucine                   | 52.00  | 6.50   | 2.00   | 119.50 |
| PM3B | B06 | L-Lysine                    | 39.00  | 8.50   | 48.00  | 33.00  |
| PM3B | B07 | L-Methionine                | 41.50  | 7.50   | 53.00  | 89.00  |
| PM3B | B08 | L-Phenylalanine             | 30.00  | 6.50   | 2.50   | 143.50 |
| PM3B | B09 | L-Proline                   | 158.50 | 7.50   | 4.50   | 229.00 |
| PM3B | B10 | L-Serine                    | 71.00  | 10.00  | 8.00   | 184.00 |
| PM3B | B11 | L-Threonine                 | 45.50  | 14.50  | 10.50  | 57.50  |
| PM3B | B12 | L-Tryptophan                | 65.50  | 34.50  | 24.00  | 60.50  |
| PM3B | C01 | L-Tyrosine                  | 66.50  | 77.00  | 71.50  | 219.50 |
| PM3B | C02 | L-Valine                    | 65.00  | 13.00  | 6.00   | 129.00 |
| PM3B | C03 | D-Alanine                   | 109.50 | 10.00  | 3.50   | 190.50 |
| PM3B | C04 | D-Asparagine                | 28.50  | 13.00  | 4.50   | 91.00  |
| PM3B | C05 | D-Aspartic acid             | 27.00  | 5.00   | 3.00   | 27.50  |
| PM3B | C06 | D-Glutamic acid             | 81.50  | 6.50   | 2.00   | 27.50  |
| PM3B | C07 | D-Lysine                    | 22.00  | 5.00   | 1.50   | 26.00  |
| PM3B | C08 | D-Serine                    | 40.50  | 7.00   | 2.50   | 94.50  |
| PM3B | C09 | D-Valine                    | 21.00  | 7.00   | 4.00   | 32.00  |
| PM3B | C10 | L-Citrulline                | 33.00  | 9.00   | 20.50  | 35.00  |
| PM3B | C11 | L-Homoserine                | 43.00  | 12.50  | 10.00  | 49.00  |
| PM3B | C12 | L-Ornithine                 | 115.00 | 27.50  | 94.50  | 54.50  |
| PM3B | D01 | N-Acetyl-L-Glutamic acid    | 41.00  | 31.00  | 24.00  | 42.00  |
| PM3B | D02 | N-Phthaloyl-L-Glutamic acid | 33.00  | 20.00  | 24.50  | 37.00  |
| PM3B | D03 | L-Pyroglutamic acid         | 33.00  | 16.50  | 10.00  | 36.00  |
| PM3B | D04 | Hydroxylamine               | 24.50  | 16.00  | 9.00   | 31.00  |
| PM3B | D05 | Methylamine                 | 37.00  | 10.50  | 1.00   | 23.50  |
| PM3B | D06 | N-Amylamine                 | 29.00  | 12.00  | 5.00   | 25.00  |
| PM3B | D07 | N-Butylamine                | 22.50  | 11.00  | 3.00   | 22.00  |
| PM3B | D08 | Ethylamine                  | 23.00  | 7.50   | 1.00   | 24.00  |

|      |     |                            |        |        |        |        |
|------|-----|----------------------------|--------|--------|--------|--------|
| PM3B | D09 | Ethanolamine               | 26.00  | 47.00  | 6.50   | 29.00  |
| PM3B | D10 | Ethylenediamine            | 28.50  | 10.50  | 11.50  | 29.50  |
| PM3B | D11 | Putrescine                 | 26.00  | 10.50  | 7.50   | 31.00  |
| PM3B | D12 | Agmatine                   | 41.00  | 26.00  | 20.00  | 48.00  |
| PM3B | E01 | Histamine                  | 51.50  | 45.00  | 34.00  | 54.50  |
| PM3B | E02 | b-Phenylethylamine         | 34.00  | 107.00 | 17.50  | 34.50  |
| PM3B | E03 | Tyramine                   | 36.00  | 153.50 | 7.50   | 32.00  |
| PM3B | E04 | Acetamide                  | 126.00 | 85.50  | 5.50   | 31.00  |
| PM3B | E05 | Formamide                  | 100.00 | 65.00  | 3.50   | 27.00  |
| PM3B | E06 | Glucuronamide              | 45.50  | 20.50  | 4.00   | 93.00  |
| PM3B | E07 | D,L-Lactamide              | 53.00  | 192.00 | 1.00   | 21.50  |
| PM3B | E08 | D-Glucosamine              | 45.00  | 10.50  | 128.50 | 24.00  |
| PM3B | E09 | D-Galactosamine            | 36.00  | 12.50  | 7.50   | 30.00  |
| PM3B | E10 | D-Mannosamine              | 87.00  | 19.50  | 65.50  | 46.50  |
| PM3B | E11 | N-Acetyl-D-Glucosamine     | 28.00  | 13.50  | 186.50 | 31.00  |
| PM3B | E12 | N-Acetyl-D-Galactosamine   | 51.50  | 35.00  | 202.50 | 62.00  |
| PM3B | F01 | N-Acetyl-D-Mannosamine     | 54.50  | 46.00  | 126.50 | 56.50  |
| PM3B | F02 | Adenine                    | 43.00  | 26.50  | 16.50  | 64.50  |
| PM3B | F03 | Adenosine                  | 22.50  | 19.50  | 188.00 | 28.50  |
| PM3B | F04 | Cytidine                   | 29.50  | 19.50  | 7.00   | 26.50  |
| PM3B | F05 | Cytosine                   | 34.50  | 48.50  | 10.00  | 28.50  |
| PM3B | F06 | Guanine                    | 36.50  | 61.00  | 22.50  | 167.50 |
| PM3B | F07 | Guanosine                  | 28.50  | 24.50  | 6.00   | 121.00 |
| PM3B | F08 | Thymine                    | 25.00  | 14.50  | 14.00  | 26.50  |
| PM3B | F09 | Thymidine                  | 30.50  | 11.50  | 12.50  | 27.50  |
| PM3B | F10 | Uracil                     | 38.50  | 24.00  | 24.00  | 42.00  |
| PM3B | F11 | Uridine                    | 37.50  | 24.00  | 23.00  | 43.00  |
| PM3B | F12 | Inosine                    | 53.50  | 35.50  | 36.50  | 86.00  |
| PM3B | G01 | Xanthine                   | 74.50  | 85.00  | 71.50  | 158.50 |
| PM3B | G02 | Xanthosine                 | 34.50  | 24.50  | 21.00  | 36.00  |
| PM3B | G03 | Uric acid                  | 106.00 | 141.50 | 104.00 | 190.50 |
| PM3B | G04 | Alloxan                    | 54.00  | 25.50  | 48.50  | 33.00  |
| PM3B | G05 | Allantoin                  | 46.00  | 17.50  | 9.50   | 135.50 |
| PM3B | G06 | Parabanic acid             | 53.50  | 71.00  | 70.50  | 104.50 |
| PM3B | G07 | D,L-a-Amino-N-Butyric acid | 51.50  | 13.50  | 6.00   | 36.00  |
| PM3B | G08 | g-Amino-N-Butyric acid     | 22.50  | 9.50   | 4.00   | 207.00 |
| PM3B | G09 | e-Amino-N-Caproic acid     | 30.00  | 17.50  | 18.50  | 36.00  |
| PM3B | G10 | D,L-a-Amino-Caprylic acid  | 69.50  | 27.00  | 36.50  | 40.00  |
| PM3B | G11 | d-Amino-N-Valeric acid     | 41.50  | 24.50  | 25.50  | 43.50  |

|      |     |                                      |        |        |        |        |
|------|-----|--------------------------------------|--------|--------|--------|--------|
| PM3B | G12 | a-Amino-N-Valeric acid               | 119.00 | 37.50  | 32.00  | 60.50  |
| PM3B | H01 | Ala-Asp                              | 54.50  | 46.00  | 37.00  | 52.50  |
| PM3B | H02 | Ala-Gln                              | 152.50 | 89.00  | 28.00  | 45.50  |
| PM3B | H03 | Ala-Glu                              | 98.50  | 28.00  | 55.50  | 40.00  |
| PM3B | H04 | Ala-Gly                              | 101.00 | 26.00  | 138.00 | 39.50  |
| PM3B | H05 | Ala-His                              | 112.50 | 23.50  | 17.50  | 57.50  |
| PM3B | H06 | Ala-Leu                              | 118.50 | 24.00  | 14.50  | 39.50  |
| PM3B | H07 | Ala-Thr                              | 51.00  | 27.00  | 18.50  | 42.00  |
| PM3B | H08 | Gly-Asn                              | 135.50 | 38.50  | 16.50  | 41.00  |
| PM3B | H09 | Gly-Gln                              | 119.00 | 79.00  | 19.50  | 42.00  |
| PM3B | H10 | Gly-Glu                              | 48.50  | 29.50  | 54.50  | 46.00  |
| PM3B | H11 | Gly-Met                              | 63.50  | 32.00  | 26.50  | 49.50  |
| PM3B | H12 | Met-Ala                              | 136.00 | 45.00  | 36.50  | 67.50  |
|      |     |                                      |        |        |        |        |
| PM4A | A01 | Negative Control                     | 64.00  | 39.50  | 50.50  | 90.00  |
| PM4A | A02 | Phosphate                            | 184.50 | 88.00  | 64.50  | 175.50 |
| PM4A | A03 | Pyrophosphate                        | 168.00 | 89.00  | 23.00  | 160.00 |
| PM4A | A04 | Trimetaphosphate                     | 175.50 | 86.50  | 14.50  | 167.50 |
| PM4A | A05 | Tripolyphosphate                     | 62.50  | 75.50  | 10.50  | 152.50 |
| PM4A | A06 | Triethyl Phosphate                   | 47.50  | 20.00  | 9.00   | 99.00  |
| PM4A | A07 | Hypophosphite                        | 50.00  | 21.50  | 18.50  | 87.50  |
| PM4A | A08 | Adenosine 2' - Monophosphate         | 152.00 | 78.50  | 155.50 | 173.00 |
| PM4A | A09 | Adenosine 3' - Monophosphate         | 151.50 | 80.50  | 103.00 | 176.00 |
| PM4A | A10 | Adenosine 5' - Monophosphate         | 154.50 | 83.50  | 114.00 | 182.50 |
| PM4A | A11 | Adenosine 2',3'-Cyclic Monophosphate | 131.00 | 88.50  | 26.50  | 167.00 |
| PM4A | A12 | Adenosine 3',5'-Cyclic Monophosphate | 169.00 | 104.00 | 90.50  | 181.50 |
| PM4A | B01 | Thiophosphate                        | 191.50 | 45.00  | 25.00  | 154.00 |
| PM4A | B02 | Dithiophosphate                      | 156.50 | 44.50  | 10.50  | 153.00 |
| PM4A | B03 | D,L-a-Glycerol Phosphate             | 150.00 | 69.00  | 8.00   | 165.00 |
| PM4A | B04 | b-Glycerol Phosphate                 | 152.00 | 74.00  | 64.50  | 170.50 |
| PM4A | B05 | Carbamyl Phosphate                   | 182.50 | 76.50  | 44.50  | 166.00 |
| PM4A | B06 | D-2-Phospho-Glyceric acid            | 163.50 | 75.00  | 76.50  | 168.50 |
| PM4A | B07 | D-3-Phospho-Glyceric acid            | 142.00 | 84.00  | 154.00 | 166.50 |
| PM4A | B08 | Guanosine 2' - Monophosphate         | 146.50 | 72.00  | 9.50   | 160.50 |
| PM4A | B09 | Guanosine 3' - Monophosphate         | 135.00 | 72.00  | 13.00  | 167.00 |
| PM4A | B10 | Guanosine 5' - Monophosphate         | 143.00 | 73.50  | 57.00  | 167.00 |
| PM4A | B11 | Guanosine 2',3'-Cyclic               | 114.50 | 74.50  | 20.00  | 161.00 |

|      |     | Monophosphate                        |        |       |        |        |
|------|-----|--------------------------------------|--------|-------|--------|--------|
| PM4A | B12 | Guanosine 3',5'-Cyclic Monophosphate | 72.00  | 75.50 | 33.50  | 174.50 |
| PM4A | C01 | Phosphoenol Pyruvate                 | 174.50 | 88.50 | 25.00  | 168.50 |
| PM4A | C02 | Phospho-Glycolic acid                | 171.50 | 51.00 | 75.00  | 157.00 |
| PM4A | C03 | D-Glucose-1-Phosphate                | 141.50 | 60.00 | 77.50  | 157.00 |
| PM4A | C04 | D-Glucose-6-Phosphate                | 140.00 | 67.00 | 80.50  | 162.50 |
| PM4A | C05 | 2-Deoxy-D-Glucose 6-Phosphate        | 144.00 | 71.00 | 84.50  | 168.50 |
| PM4A | C06 | D-Glucosamine-6-Phosphate            | 149.00 | 70.00 | 89.50  | 165.50 |
| PM4A | C07 | 6-Phospho-Gluconic acid              | 147.00 | 74.00 | 7.00   | 163.50 |
| PM4A | C08 | Cytidine 2'-Monophosphate            | 140.00 | 65.50 | 92.50  | 165.50 |
| PM4A | C09 | Cytidine 3'-Monophosphate            | 134.00 | 65.50 | 181.50 | 172.50 |
| PM4A | C10 | Cytidine 5'-Monophosphate            | 142.50 | 74.50 | 15.50  | 161.50 |
| PM4A | C11 | Cytidine 2',3'-Cyclic Monophosphate  | 86.00  | 71.50 | 18.00  | 161.50 |
| PM4A | C12 | Cytidine 3',5'-Cyclic Monophosphate  | 137.50 | 90.50 | 33.50  | 179.00 |
| PM4A | D01 | D-Mannose-1-Phosphate                | 156.00 | 76.00 | 24.00  | 167.00 |
| PM4A | D02 | D-Mannose-6-Phosphate                | 142.00 | 49.50 | 153.50 | 153.00 |
| PM4A | D03 | Cysteamine-S-Phosphate               | 197.00 | 13.50 | 14.50  | 131.00 |
| PM4A | D04 | Phospho-L-Arginine                   | 174.00 | 82.00 | 60.50  | 175.00 |
| PM4A | D05 | O-Phospho-D-Serine                   | 159.00 | 67.50 | 42.00  | 158.50 |
| PM4A | D06 | O-Phospho-L-Serine                   | 148.00 | 78.50 | 80.50  | 172.00 |
| PM4A | D07 | O-Phospho-L-Threonine                | 135.00 | 69.00 | 63.50  | 178.00 |
| PM4A | D08 | Uridine 2'-Monophosphate             | 142.50 | 67.00 | 79.00  | 163.50 |
| PM4A | D09 | Uridine 3'-Monophosphate             | 138.50 | 68.00 | 8.00   | 166.00 |
| PM4A | D10 | Uridine 5'-Monophosphate             | 138.50 | 71.50 | 91.00  | 163.00 |
| PM4A | D11 | Uridine 2',3'-Cyclic Monophosphate   | 51.00  | 69.50 | 9.50   | 158.50 |
| PM4A | D12 | Uridine 3',5'-Cyclic Monophosphate   | 146.00 | 89.00 | 33.00  | 178.50 |
| PM4A | E01 | O-Phospho-D-Tyrosine                 | 130.50 | 76.50 | 74.50  | 162.50 |
| PM4A | E02 | O-Phospho-L-Tyrosine                 | 159.00 | 72.50 | 73.00  | 176.50 |
| PM4A | E03 | Phosphocreatine                      | 179.00 | 76.00 | 10.00  | 164.50 |
| PM4A | E04 | Phosphoryl Choline                   | 155.50 | 77.50 | 178.00 | 189.00 |
| PM4A | E05 | O-Phosphoryl-Ethanolamine            | 143.00 | 65.50 | 56.00  | 161.00 |
| PM4A | E06 | Phosphono Acetic acid                | 39.00  | 11.50 | 56.00  | 118.50 |

|      |     |                                      |        |       |        |        |
|------|-----|--------------------------------------|--------|-------|--------|--------|
| PM4A | E07 | 2-Aminoethyl Phosphonic acid         | 38.00  | 7.00  | 111.00 | 94.50  |
| PM4A | E08 | Methylene Diphosphonic acid          | 34.50  | 10.00 | 45.00  | 88.50  |
| PM4A | E09 | Thymidine 3'-Monophosphate           | 160.50 | 67.50 | 161.50 | 165.00 |
| PM4A | E10 | Thymidine 5'-Monophosphate           | 130.50 | 64.50 | 11.00  | 176.00 |
| PM4A | E11 | Inositol Hexaphosphate               | 51.50  | 27.50 | 13.50  | 152.00 |
| PM4A | E12 | Thymidine 3',5'-Cyclic Monophosphate | 150.00 | 84.00 | 33.00  | 169.00 |
| PM4A | F01 | Negative Control                     | 76.00  | 32.50 | 34.50  | 113.50 |
| PM4A | F02 | Sulfate                              | 174.50 | 77.50 | 63.00  | 166.50 |
| PM4A | F03 | Thiosulfate                          | 156.00 | 63.50 | 9.00   | 157.00 |
| PM4A | F04 | Tetrathionate                        | 180.50 | 46.00 | 14.50  | 169.00 |
| PM4A | F05 | Thiophosphate                        | 97.00  | 75.00 | 10.00  | 156.50 |
| PM4A | F06 | Dithiophosphate                      | 106.50 | 75.50 | 8.50   | 168.50 |
| PM4A | F07 | L-Cysteine                           | 69.00  | 61.00 | 52.00  | 171.00 |
| PM4A | F08 | D-Cysteine                           | 67.50  | 19.00 | 13.50  | 111.50 |
| PM4A | F09 | Cys-Gly                              | 77.00  | 50.00 | 82.50  | 133.00 |
| PM4A | F10 | L-Cysteic acid                       | 67.00  | 23.50 | 28.50  | 142.50 |
| PM4A | F11 | Cysteamine                           | 85.00  | 47.00 | 26.50  | 128.00 |
| PM4A | F12 | L-Cysteine Sulfinic acid             | 108.50 | 96.50 | 110.00 | 186.00 |
| PM4A | G01 | N-Acetyl-L-Cysteine                  | 78.50  | 35.00 | 61.50  | 130.00 |
| PM4A | G02 | S-Methyl-L-Cysteine                  | 77.00  | 62.00 | 13.00  | 134.00 |
| PM4A | G03 | Cystathionine                        | 67.00  | 20.50 | 84.50  | 156.50 |
| PM4A | G04 | Lanthionine                          | 66.00  | 19.50 | 39.00  | 150.00 |
| PM4A | G05 | Glutathione                          | 71.50  | 18.50 | 106.50 | 109.50 |
| PM4A | G06 | D,L-Ethionine                        | 66.00  | 11.50 | 18.50  | 99.50  |
| PM4A | G07 | L-Methionine                         | 91.00  | 48.50 | 10.50  | 171.00 |
| PM4A | G08 | D-Methionine                         | 93.00  | 58.50 | 69.50  | 173.00 |
| PM4A | G09 | Gly-Met                              | 89.00  | 22.00 | 89.50  | 166.00 |
| PM4A | G10 | N-Acetyl-D,L-Methionine              | 66.00  | 21.50 | 79.00  | 145.50 |
| PM4A | G11 | L-Methionine Sulfoxide               | 86.50  | 34.00 | 70.50  | 165.00 |
| PM4A | G12 | L-Methionine Sulfone                 | 86.50  | 43.00 | 41.50  | 168.00 |
| PM4A | H01 | L-Djenkolic acid                     | 76.00  | 31.50 | 65.50  | 141.00 |
| PM4A | H02 | Thiourea                             | 100.00 | 31.00 | 18.00  | 114.50 |
| PM4A | H03 | 1-Thio-b-D-Glucose                   | 71.50  | 23.50 | 42.50  | 128.00 |
| PM4A | H04 | D,L-Lipoamide                        | 140.50 | 19.50 | 86.50  | 117.50 |
| PM4A | H05 | Taurocholic acid                     | 62.00  | 9.00  | 12.00  | 179.50 |
| PM4A | H06 | Taurine                              | 59.50  | 14.50 | 27.50  | 167.00 |
| PM4A | H07 | Hypotaurine                          | 80.50  | 26.00 | 29.50  | 175.00 |
| PM4A | H08 | p-Aminobenzene Sulfonic acid         | 77.50  | 25.00 | 40.50  | 96.50  |
| PM4A | H09 | Butane Sulfonic acid                 | 68.50  | 24.50 | 31.50  | 165.50 |

|      |     |                                         |        |       |        |        |
|------|-----|-----------------------------------------|--------|-------|--------|--------|
| PM4A | H10 | 2-Hydroxyethane Sulfonic acid           | 66.50  | 20.50 | 31.50  | 167.50 |
| PM4A | H11 | Methane Sulfonic acid                   | 74.00  | 29.00 | 52.50  | 172.50 |
| PM4A | H12 | Tetramethylene Sulfone                  | 83.50  | 41.50 | 53.00  | 121.50 |
|      |     |                                         |        |       |        |        |
| PM9  | A01 | 1% NaCl                                 | 191.00 | 42.00 | 46.00  | 164.00 |
| PM9  | A02 | 2% NaCl                                 | 182.50 | 30.00 | 126.50 | 153.50 |
| PM9  | A03 | 3% NaCl                                 | 183.50 | 30.50 | 117.00 | 124.50 |
| PM9  | A04 | 4% NaCl                                 | 180.00 | 25.00 | 228.50 | 101.50 |
| PM9  | A05 | 5% NaCl                                 | 161.00 | 20.50 | 38.00  | 66.50  |
| PM9  | A06 | 5.5 %NaCl                               | 159.00 | 21.50 | 29.00  | 50.00  |
| PM9  | A07 | 6% NaCl                                 | 163.50 | 34.00 | 33.50  | 42.50  |
| PM9  | A08 | 6.5% NaCl                               | 158.00 | 34.00 | 45.50  | 37.50  |
| PM9  | A09 | 7% NaCl                                 | 149.50 | 30.00 | 34.00  | 35.00  |
| PM9  | A10 | 8% NaCl                                 | 133.50 | 38.00 | 40.50  | 30.50  |
| PM9  | A11 | 9% NaCl                                 | 133.50 | 45.50 | 53.00  | 40.50  |
| PM9  | A12 | 10% NaCl                                | 127.00 | 55.50 | 60.50  | 41.00  |
| PM9  | B01 | 6% NaCl                                 | 174.00 | 41.50 | 47.00  | 47.00  |
| PM9  | B02 | 6% NaCl + Betaine                       | 168.00 | 24.00 | 110.50 | 47.00  |
| PM9  | B03 | 6% NaCl + N,N Dimethyl Glycine          | 164.50 | 26.00 | 32.00  | 47.50  |
| PM9  | B04 | 6% NaCl + Sarcosine                     | 170.00 | 13.00 | 27.50  | 45.00  |
| PM9  | B05 | 6% NaCl + Dimethyl Sulphonyl Propionate | 161.00 | 19.00 | 29.00  | 45.00  |
| PM9  | B06 | 6% NaCl + MOPS                          | 156.50 | 16.50 | 37.00  | 48.50  |
| PM9  | B07 | 6% NaCl + Ectoine                       | 150.50 | 20.00 | 24.50  | 42.50  |
| PM9  | B08 | 6% NaCl + Choline                       | 145.50 | 18.50 | 105.50 | 48.50  |
| PM9  | B09 | 6% NaCl + Phosphorylcholine             | 138.50 | 25.50 | 98.50  | 37.00  |
| PM9  | B10 | 6% NaCl + Creatine                      | 136.00 | 29.00 | 36.50  | 38.00  |
| PM9  | B11 | 6% NaCl + Creatinine                    | 136.50 | 32.50 | 46.00  | 44.50  |
| PM9  | B12 | 6% NaCl + L-Carnitine                   | 152.50 | 55.50 | 53.00  | 47.50  |
| PM9  | C01 | 6% NaCl + KCl                           | 178.00 | 42.00 | 48.00  | 47.50  |
| PM9  | C02 | 6% NaCl + L-Proline                     | 173.00 | 19.00 | 30.50  | 39.00  |
| PM9  | C03 | 6% NaCl + N-Acetyl-L-Glutamine          | 159.00 | 19.50 | 26.00  | 41.00  |
| PM9  | C04 | 6% NaCl + b-Glutamic acid               | 148.00 | 16.00 | 23.50  | 50.50  |
| PM9  | C05 | 6% NaCl + g-Amino-N-Butyric acid        | 154.00 | 17.50 | 19.00  | 53.00  |
| PM9  | C06 | 6% NaCl + Glutathione                   | 149.50 | 19.00 | 19.00  | 40.00  |
| PM9  | C07 | 6% NaCl + Glycerol                      | 139.00 | 12.00 | 22.50  | 38.50  |
| PM9  | C08 | 6% NaCl + Trehalose                     | 138.00 | 22.50 | 18.50  | 39.00  |
| PM9  | C09 | 6% NaCl + Trimethylamine-N-Oxide        | 133.50 | 16.50 | 25.50  | 30.50  |
| PM9  | C10 | 6% NaCl + Trimethylamine                | 133.00 | 27.00 | 31.00  | 42.00  |



|     |     |                             |        |       |        |        |
|-----|-----|-----------------------------|--------|-------|--------|--------|
| PM9 | C11 | 6% NaCl + Octopine          | 130.00 | 26.50 | 47.00  | 42.50  |
| PM9 | C12 | 6% NaCl + Trigonelline      | 138.50 | 46.00 | 47.00  | 42.50  |
| PM9 | D01 | 3% Potassium Chloride       | 169.00 | 50.00 | 32.50  | 180.00 |
| PM9 | D02 | 4% Potassium chloride       | 95.50  | 29.50 | 18.00  | 157.50 |
| PM9 | D03 | 5% Potassium Chloride       | 45.50  | 24.00 | 22.00  | 115.00 |
| PM9 | D04 | 6% Potassium chloride       | 32.00  | 19.00 | 12.50  | 98.00  |
| PM9 | D05 | 2% Sodium Sulfate           | 150.00 | 13.50 | 15.50  | 129.00 |
| PM9 | D06 | 3% Sodium Sulfate           | 149.00 | 14.00 | 24.50  | 126.50 |
| PM9 | D07 | 4% Sodium Sulfate           | 145.00 | 10.00 | 10.50  | 122.50 |
| PM9 | D08 | 5% Sodium Sulfate           | 136.00 | 12.50 | 34.00  | 123.00 |
| PM9 | D09 | 5% Ethylene Glycol          | 138.00 | 23.00 | 219.50 | 191.00 |
| PM9 | D10 | 10% Ethylene Glycol         | 113.50 | 22.00 | 218.00 | 136.50 |
| PM9 | D11 | 15% Ethylene Glycol         | 78.50  | 17.50 | 121.00 | 117.50 |
| PM9 | D12 | 20% Ethylene Glycol         | 97.50  | 32.00 | 214.50 | 122.00 |
| PM9 | E01 | 1% Sodium Formate           | 145.50 | 58.00 | 42.50  | 168.00 |
| PM9 | E02 | 2% Sodium Formate           | 60.00  | 24.50 | 24.00  | 132.50 |
| PM9 | E03 | 3% Sodium Formate           | 30.50  | 19.50 | 22.00  | 95.00  |
| PM9 | E04 | 4% Sodium Formate           | 21.00  | 12.50 | 18.50  | 39.00  |
| PM9 | E05 | 5% Sodium Formate           | 20.50  | 6.50  | 15.50  | 27.50  |
| PM9 | E06 | 6% Sodium Formate           | 22.50  | 20.00 | 26.50  | 22.50  |
| PM9 | E07 | 2% Urea                     | 112.00 | 14.00 | 18.50  | 180.50 |
| PM9 | E08 | 3% Urea                     | 30.00  | 14.00 | 16.00  | 172.50 |
| PM9 | E09 | 4% Urea                     | 31.00  | 16.00 | 28.50  | 124.00 |
| PM9 | E10 | 5% Urea                     | 30.50  | 20.00 | 27.00  | 57.50  |
| PM9 | E11 | 6% Urea                     | 36.00  | 31.50 | 33.50  | 24.50  |
| PM9 | E12 | 7% Urea                     | 60.00  | 59.00 | 50.50  | 48.00  |
| PM9 | F01 | 1% Sodium Lactate           | 61.50  | 52.00 | 52.00  | 90.00  |
| PM9 | F02 | 2% Sodium Lactate           | 40.50  | 35.50 | 22.00  | 30.50  |
| PM9 | F03 | 3% Sodium Lactate           | 22.00  | 15.50 | 33.00  | 23.50  |
| PM9 | F04 | 4% Sodium Lactate           | 24.50  | 7.50  | 32.00  | 18.00  |
| PM9 | F05 | 5% Sodium Lactate           | 24.50  | 25.00 | 33.00  | 32.00  |
| PM9 | F06 | 6% Sodium Lactate           | 22.50  | 4.00  | 31.50  | 23.50  |
| PM9 | F07 | 7% Sodium Lactate           | 30.50  | 5.50  | 27.00  | 21.00  |
| PM9 | F08 | 8% Sodium Lactate           | 18.00  | 3.50  | 24.50  | 8.50   |
| PM9 | F09 | 9% Sodium Lactate           | 35.50  | 6.50  | 30.00  | 13.00  |
| PM9 | F10 | 10% Sodium Lactate          | 34.00  | 17.00 | 34.50  | 30.50  |
| PM9 | F11 | 11% Sodium Lactate          | 47.50  | 25.00 | 29.50  | 26.50  |
| PM9 | F12 | 12% Sodium Lactate          | 58.50  | 46.00 | 41.00  | 36.50  |
| PM9 | G01 | 20mM Sodium Phosphate pH 7  | 168.50 | 46.50 | 41.00  | 173.00 |
| PM9 | G02 | 50mM Sodium Phosphate pH 7  | 93.50  | 30.00 | 30.00  | 136.00 |
| PM9 | G03 | 100mM Sodium Phosphate pH 7 | 54.50  | 23.00 | 34.50  | 136.50 |
| PM9 | G04 | 200mM Sodium Phosphate pH 7 | 32.00  | 26.00 | 16.00  | 144.00 |

|     |     |                              |        |       |        |        |
|-----|-----|------------------------------|--------|-------|--------|--------|
| PM9 | G05 | 20mM Sodium Benzoate pH 5.2  | 40.50  | 16.00 | 18.50  | 132.00 |
| PM9 | G06 | 50mM Sodium Benzoate pH 5.2  | 19.00  | 14.00 | 27.00  | 26.00  |
| PM9 | G07 | 100mM Sodium Benzoate pH 5.2 | 21.00  | 11.50 | 16.50  | 16.50  |
| PM9 | G08 | 200mM Sodium Benzoate pH 5.2 | 26.00  | 9.50  | 13.00  | 23.00  |
| PM9 | G09 | 10mM Ammonium Sulfate pH 8   | 33.00  | 24.00 | 224.50 | 166.00 |
| PM9 | G10 | 20mM Ammonium Sulfate pH 8   | 42.00  | 30.50 | 204.00 | 167.00 |
| PM9 | G11 | 50mM Ammonium Sulfate pH 8   | 43.00  | 38.50 | 114.50 | 147.00 |
| PM9 | G12 | 100mM Ammonium Sulfate pH 8  | 57.50  | 54.00 | 126.50 | 154.00 |
| PM9 | H01 | 10mM Sodium Nitrate          | 173.00 | 48.00 | 238.00 | 179.50 |
| PM9 | H02 | 20mM Sodium Nitrate          | 144.00 | 36.50 | 237.50 | 182.00 |
| PM9 | H03 | 40mM Sodium Nitrate          | 124.50 | 27.50 | 219.00 | 178.50 |
| PM9 | H04 | 60mM Sodium Nitrate          | 119.50 | 27.50 | 222.50 | 209.00 |
| PM9 | H05 | 80mM Sodium Nitrate          | 118.50 | 25.00 | 122.00 | 190.50 |
| PM9 | H06 | 100mM Sodium Nitrate         | 119.00 | 21.50 | 119.50 | 188.00 |
| PM9 | H07 | 10mM Sodium Nitrite          | 157.50 | 27.50 | 28.00  | 180.50 |
| PM9 | H08 | 20mM Sodium Nitrite          | 137.50 | 24.00 | 20.50  | 175.50 |
| PM9 | H09 | 40mM Sodium Nitrite          | 72.50  | 29.00 | 27.50  | 168.50 |
| PM9 | H10 | 60mM Sodium Nitrite          | 39.00  | 31.50 | 43.00  | 145.50 |
| PM9 | H11 | 80mM Sodium Nitrite          | 44.50  | 45.00 | 39.50  | 119.50 |
| PM9 | H12 | 100mM Sodium Nitrite         | 55.00  | 47.50 | 56.00  | 67.50  |

273

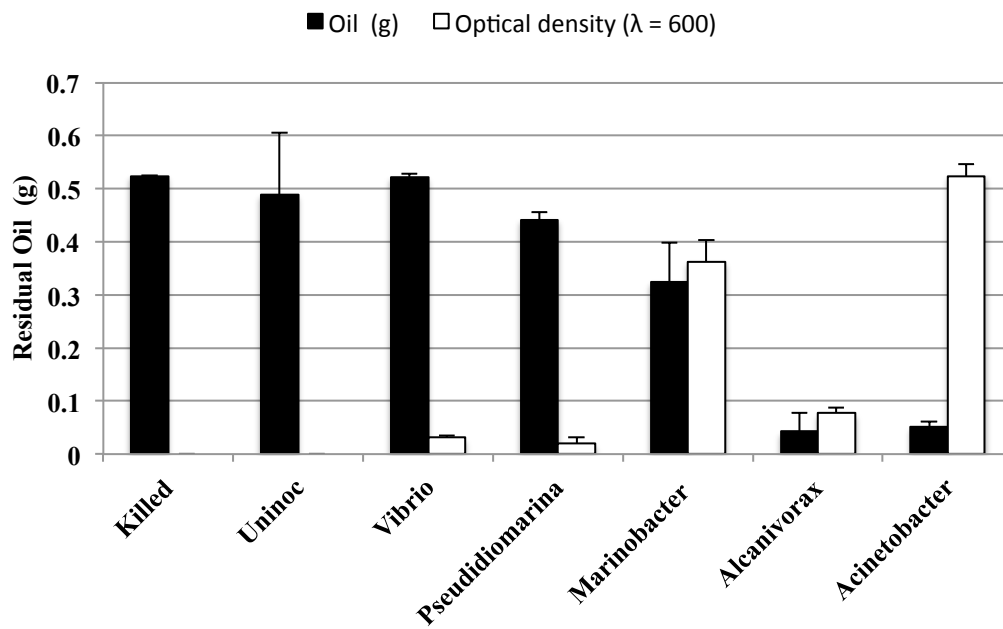

Figure S1: Degradation of crude oil by representative pure cultures isolated from oiled beach sands in this study. The proportion of residual oil is plotted along with the concomitant increase in cell biomass. Residual oil was extracted with chloroform and measured gravimetrically in pre-weighted glass vials. Values are the average of triplicates and error bars represent one standard deviation.

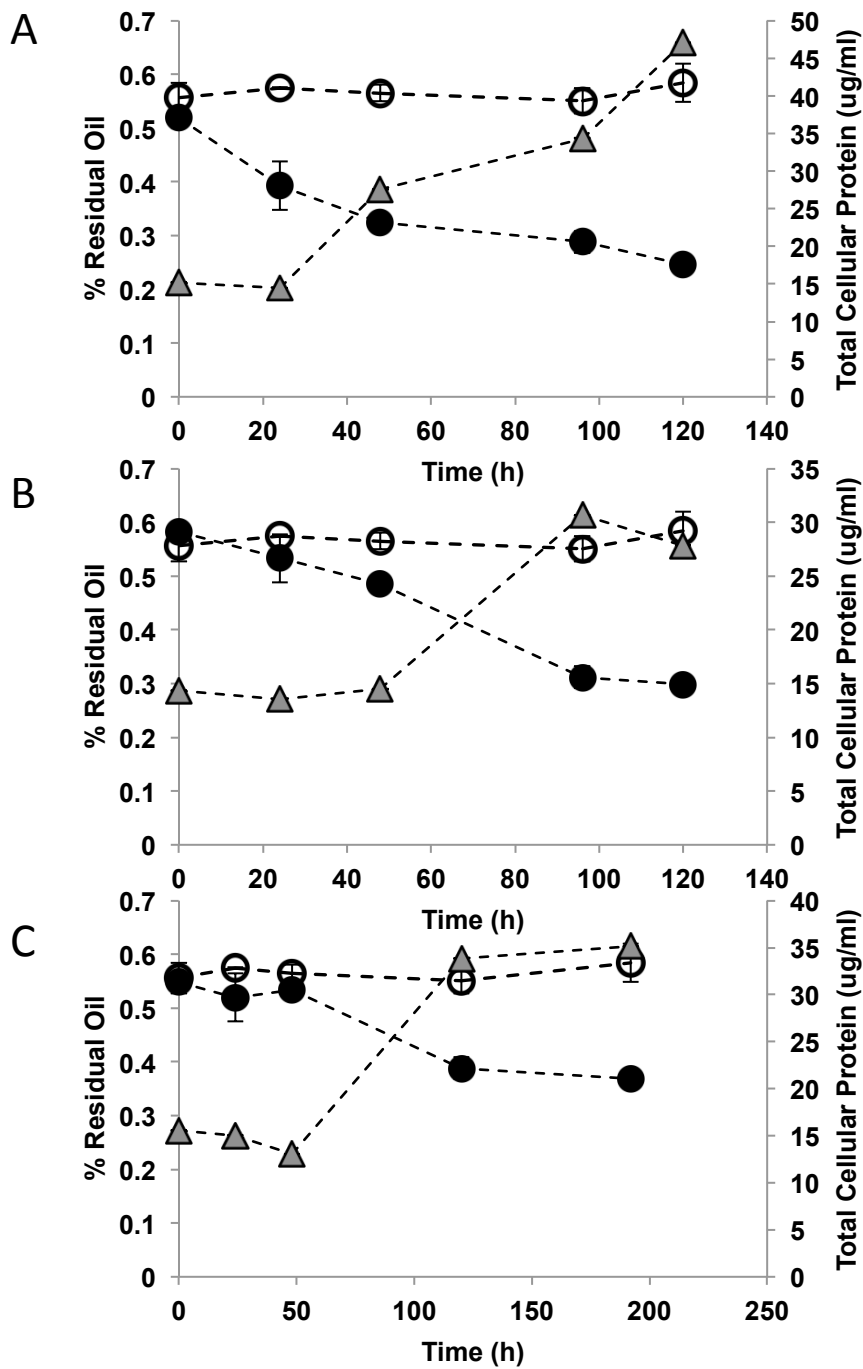

Figure S2: Growth response (▽) as total cellular protein, of *Marinobacter* (A), *Acinetobacter* (B) and *Alcanivorax* (C) strains with concomitant crude oil degradation (●) in comparison to uninoculated control cultures (○). The concentration of residual oil was determined spectrophotometrically in chloroform extracts ( $\lambda=520$ ) and total cellular protein was quantified using the Bradford method. Values represent the average of triplicates and error bars represent one standard deviation.

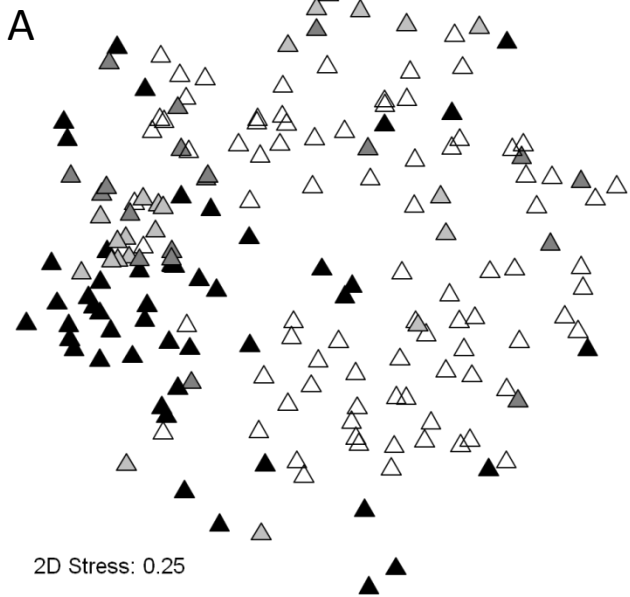

**B**

**Analysis of Similarity**

|          | Clean | Low   | Moderate | High |
|----------|-------|-------|----------|------|
| Clean    |       |       |          |      |
| Low      | 0.001 |       |          |      |
| Moderate | 0.001 | 0.374 |          |      |
| High     | 0.001 | 0.029 | 0.036    |      |

**C**

**Similarity Percentages (SIMPER)**

|     | Clean | Low | Moderate | High |
|-----|-------|-----|----------|------|
| 661 |       | 729 | 661      | 729  |
| 804 |       | 804 | 729      | 600  |
| 470 |       | 661 | 804      | 844  |
| 977 |       | 571 | 571      | 661  |
| 38% |       | 53% | 54%      | 54%  |

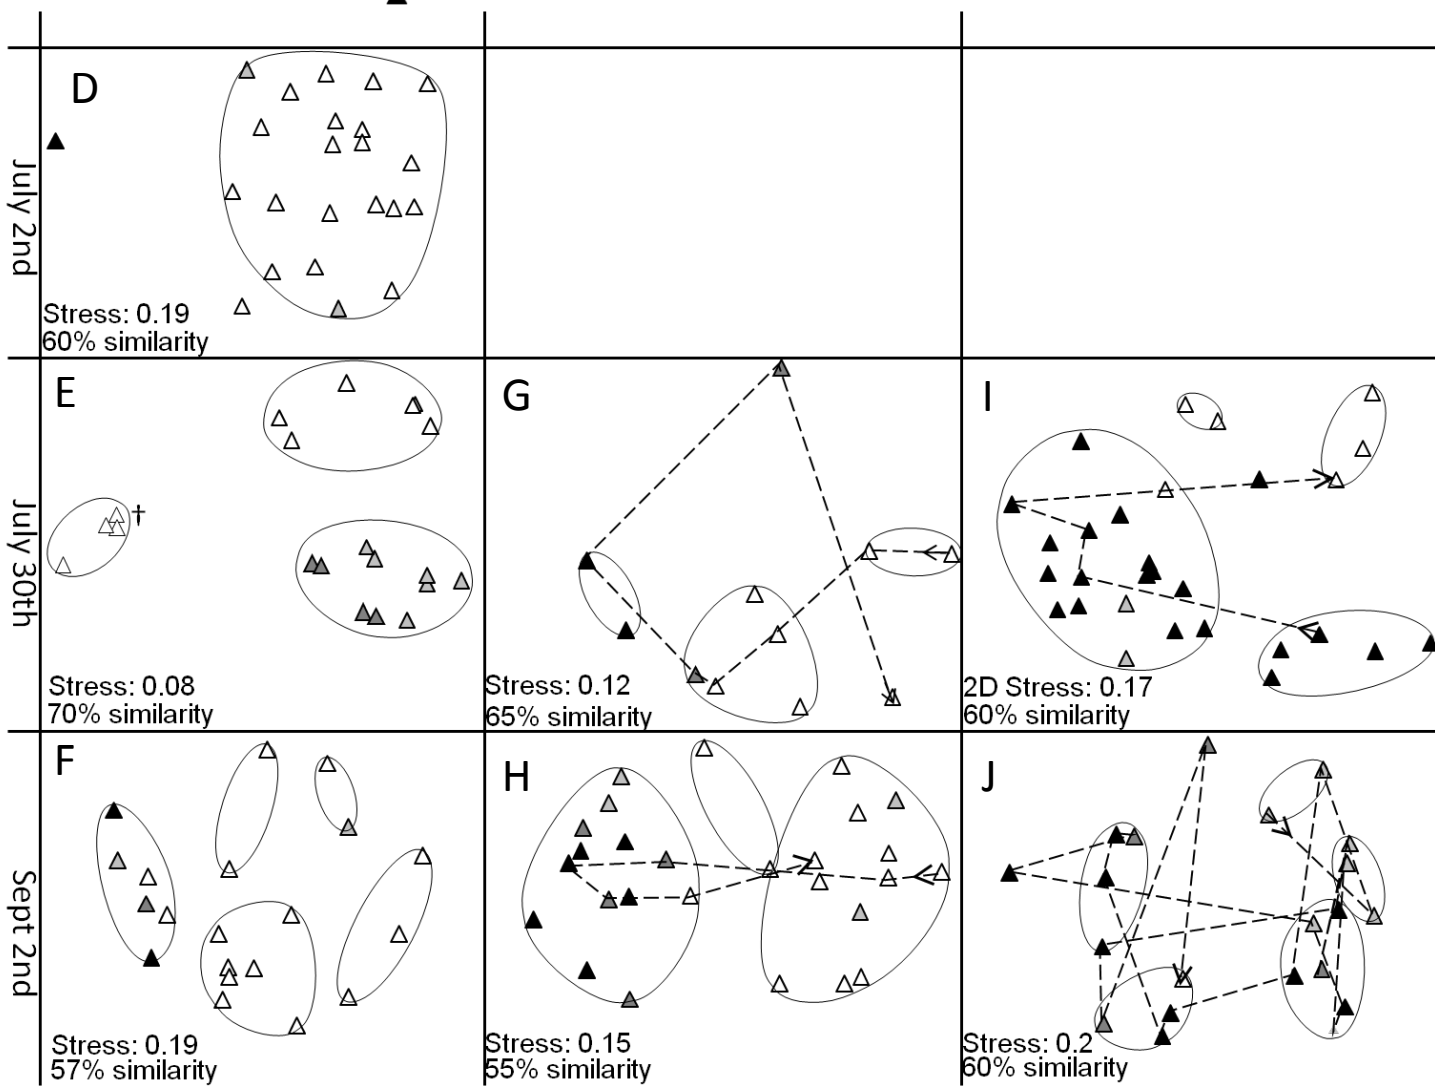

Figure S3. Community fingerprinting data generated through ARISA based analysis. These data represent 150 samples, spanning three sampling trips, that were collected from clean and oiled sands from Pensacola Beach. All NMDS plots were generated from a Bray-Curtis resemblance matrix calculated using  $\log(X+1)$  transformed, normalized peak data. Shading corresponds to qualitative assessment of oil contamination (white = clean, light gray = low, gray = moderate, black = heavy). When present, clustering represents Bray-Curtis similarity between samples. (A) All samples collected from the study area to date. Clustering pattern indicates pronounced, if scattered, effect of oil contamination. (B) Analysis of similarity (ANOSIM) test performed on all samples to determine significance of grouping samples by qualitative oil contamination. The global R value was 0.21 corresponding to a global P value of 0.001. Pairwise p-values are indicated in the table and black cells are significant. (C) A similarity percentages (SIMPER) test was used to determine key fragments that lead to the significant grouping patterns. Note all 4 top peaks for the low and moderate groups are the same. (D-E) Sectioned core samples taken from all 3 sampling trips. † These samples were from the surface layer of the cores during an algal bloom are likely contaminated by chloroplast DNA (F,G) Vertical transect samples taken from beach surface, through the oil layer to clean underlying sediments. Trajectories are overlaid on both plots starting at the surface and preceding to the deepest samples. Note not all points were included in the trajectories. (H,I) Samples collected along a horizontal transect along the oil layer. Over laid trajectories began furthest from the beach and proceed to the water.

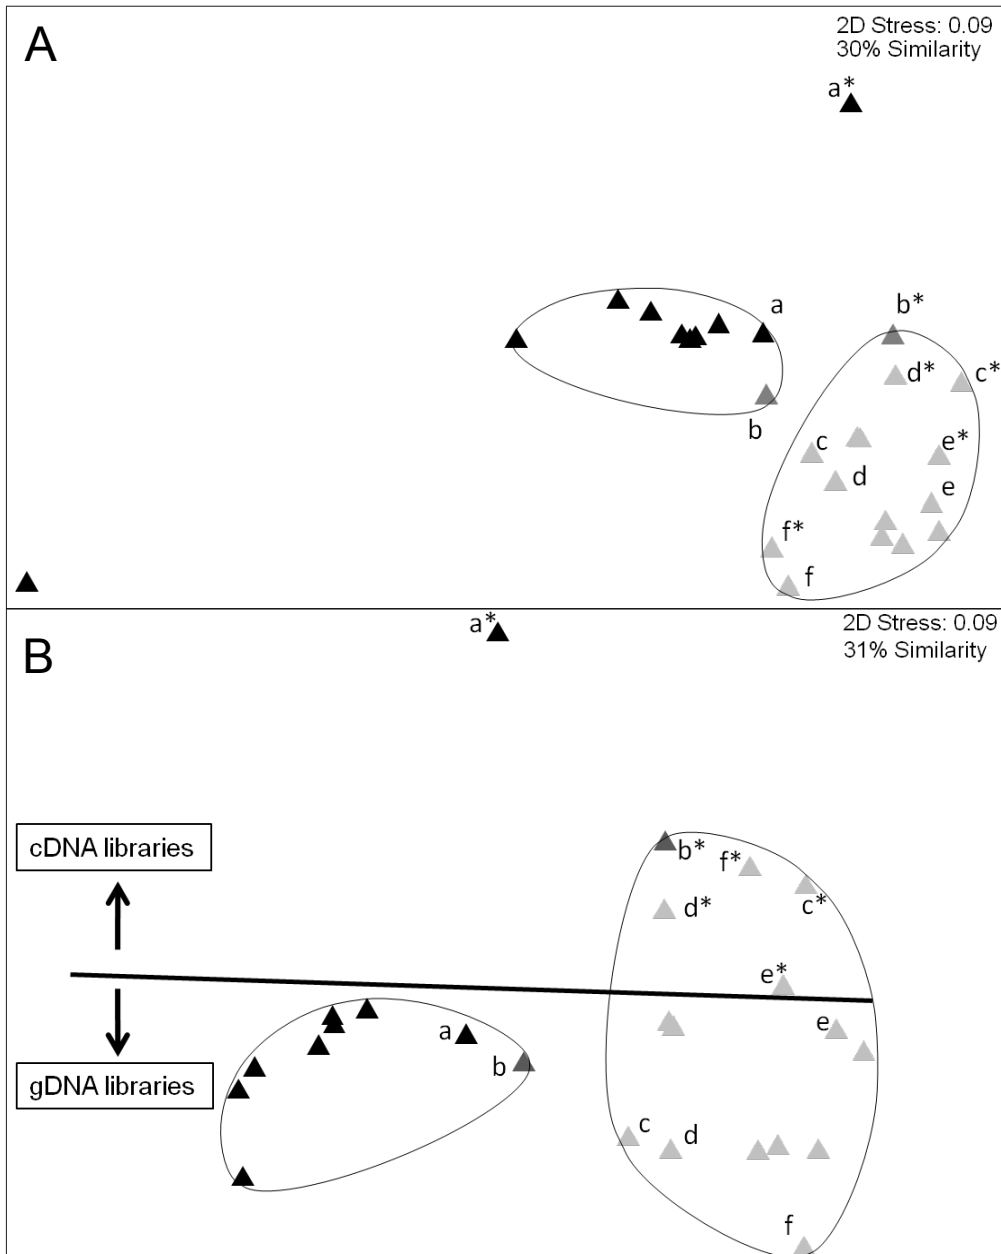

Figure S4. Bacterial community response to oil contamination in beach sands assessed using the weighted UniFrac metric and visualized with NMDS plots. Pensacola oiled samples are colored black, clean Pensacola and St. George Island samples are colored grey. Lowercase letters indicate samples derived from the same sand sample, asterisks (\*) indicate RNA based sequence libraries. Subplot (A) includes all samples, while the outlier (dominated by Spirochaetes) is removed in subplot (B). Microbial communities reveal a strong response to oil contamination by grouping together on the left side of the plot. Notably, St. George Island samples (e,f) and clean Pensacola samples are not resolved using weighted UniFrac.
